# Supplementary material
Source: ML conference proceedings conference paper supplement (https://openreview.net/forum?id=HFbf9PIjqgq)

# ReMINE Loss Breakdown

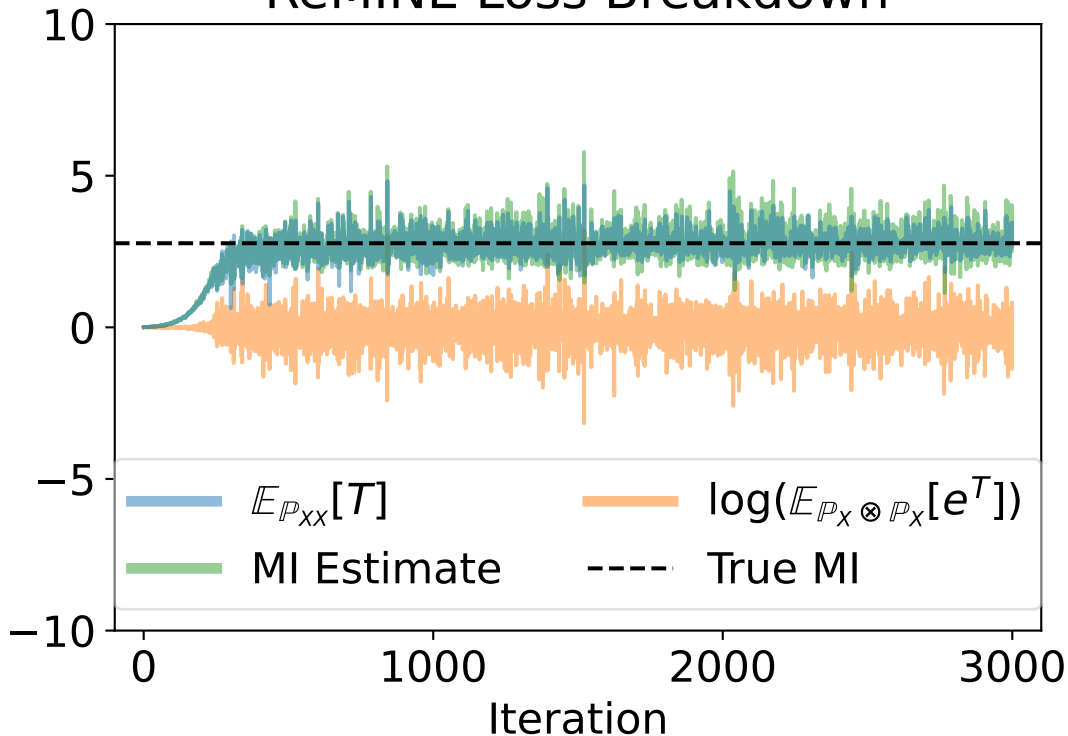

Supplement: supplementary_material [file attachment]

# ReNWJ Loss Breakdown

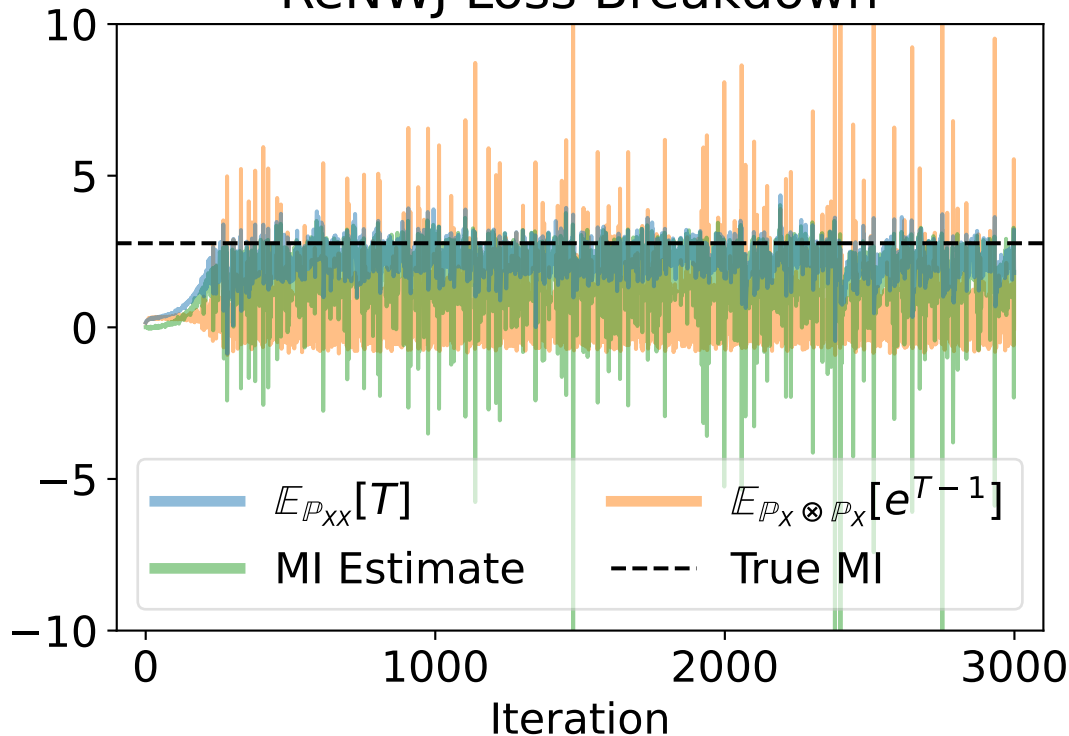

Supplement: supplementary_material [file attachment]

# MINE Loss Breakdown

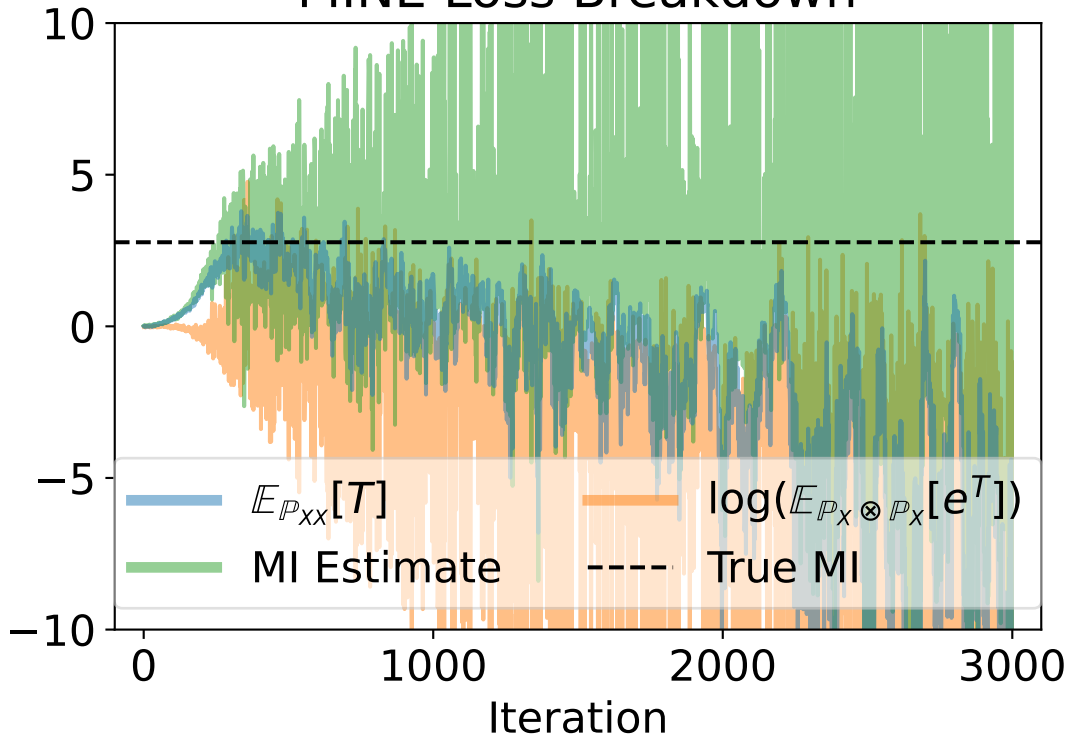

Supplement: supplementary_material [file attachment]

# ReMINE-trained $T_{\theta}(x_1, x_2)$

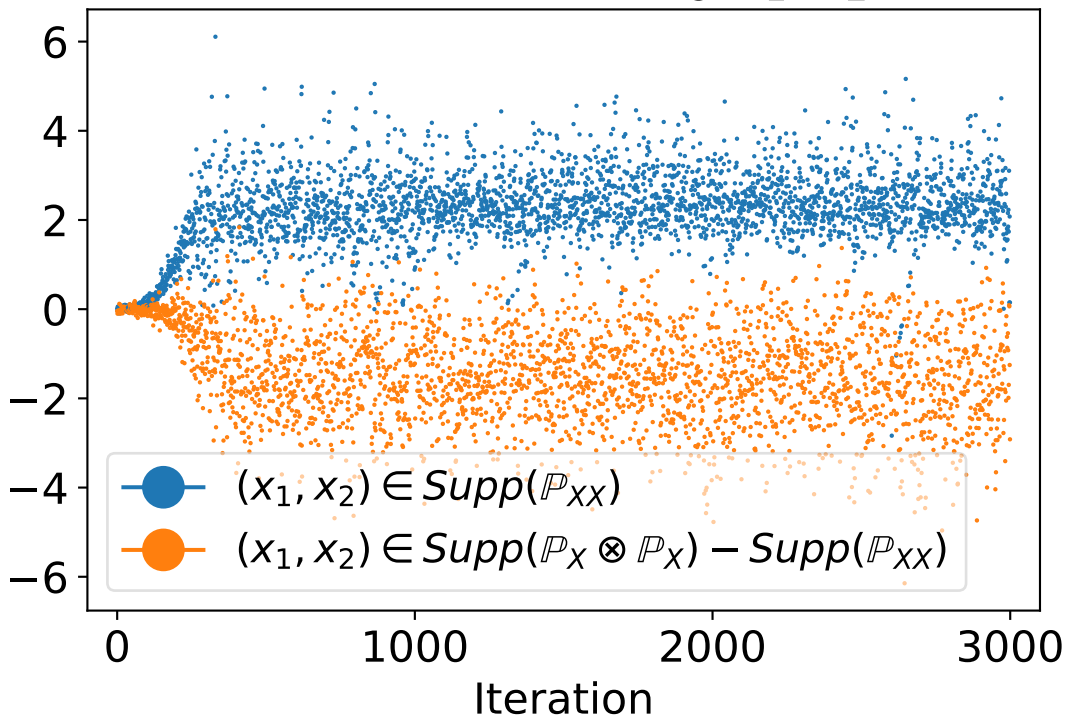

Supplement: supplementary_material [file attachment]

# NWJ Loss Breakdown

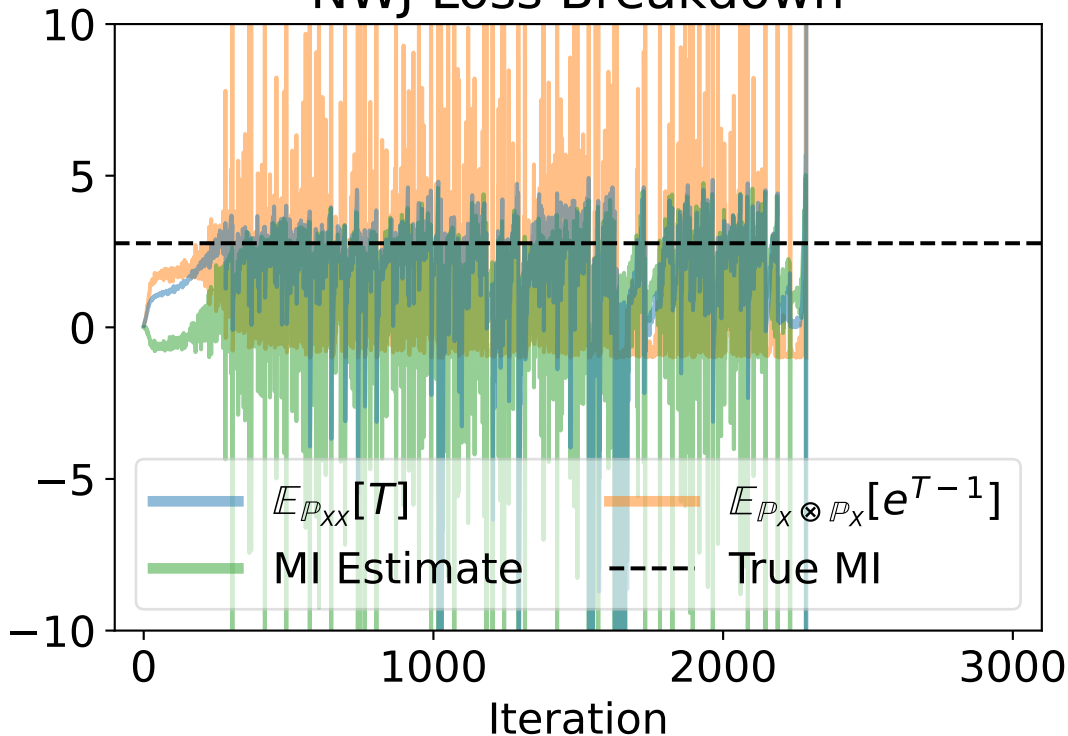

Supplement: supplementary_material [file attachment]

# ReNWJ Loss Breakdown

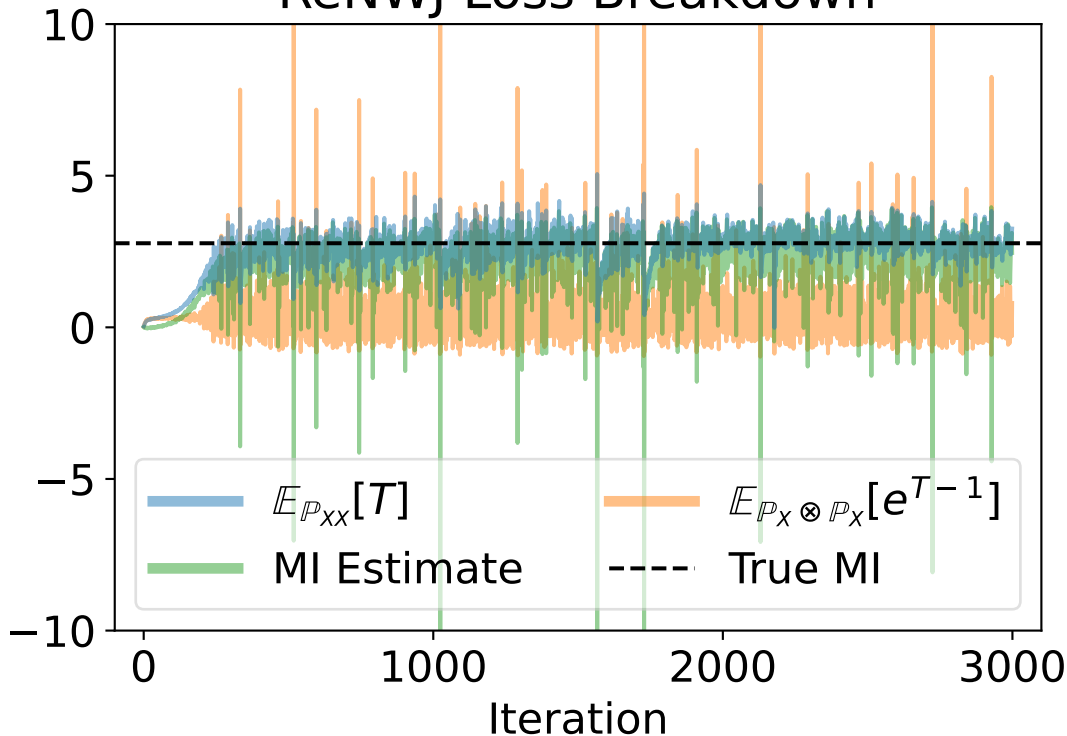

Supplement: supplementary_material [file attachment]

# NWJ Loss Breakdown

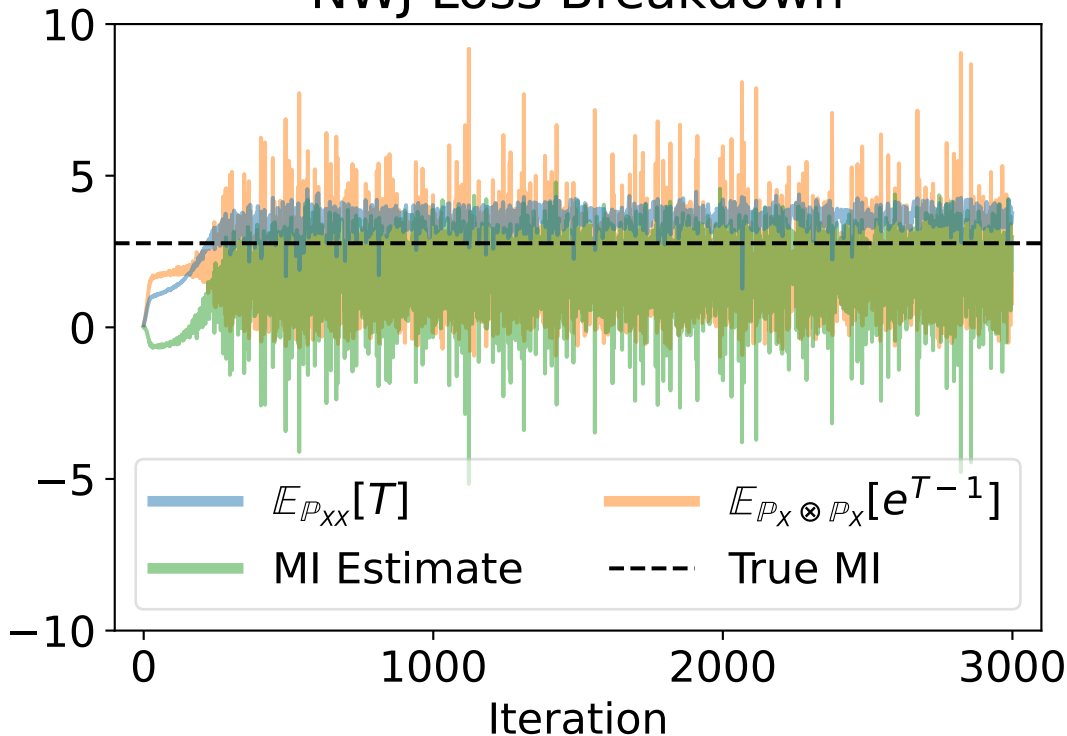

Supplement: supplementary_material [file attachment]

MINE

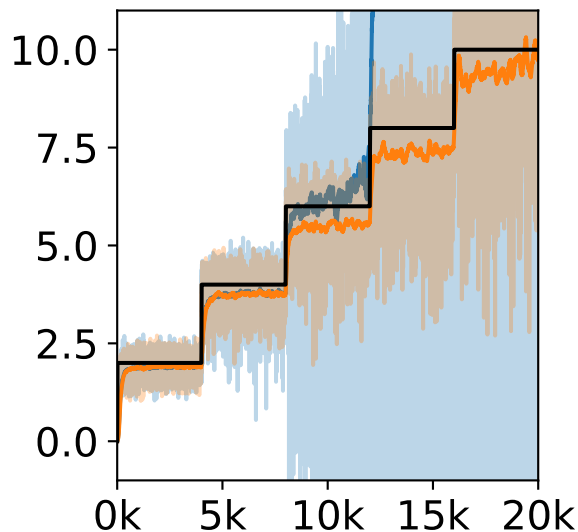

SMILE

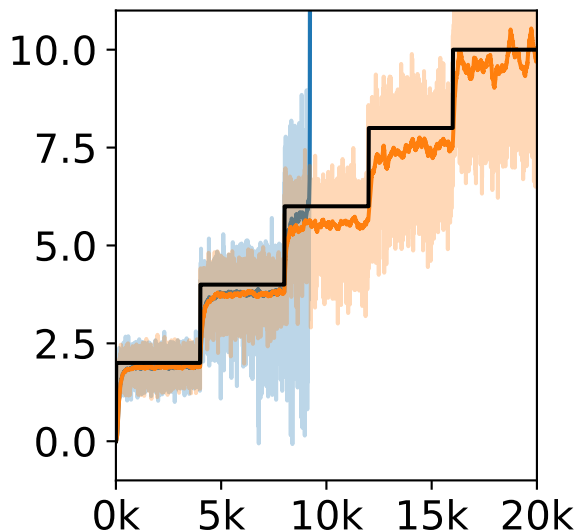

InfoNCE

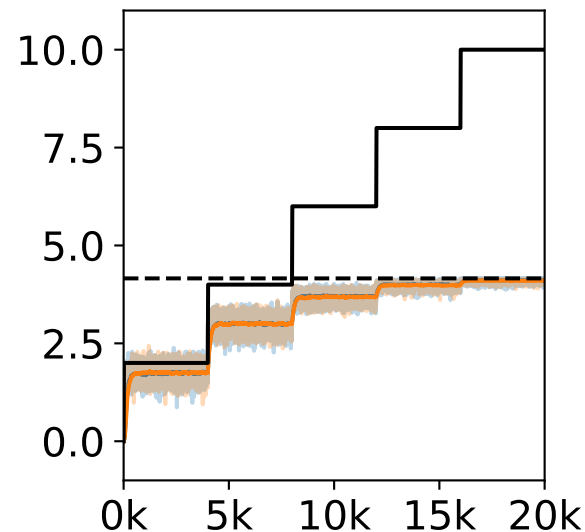

NWJ

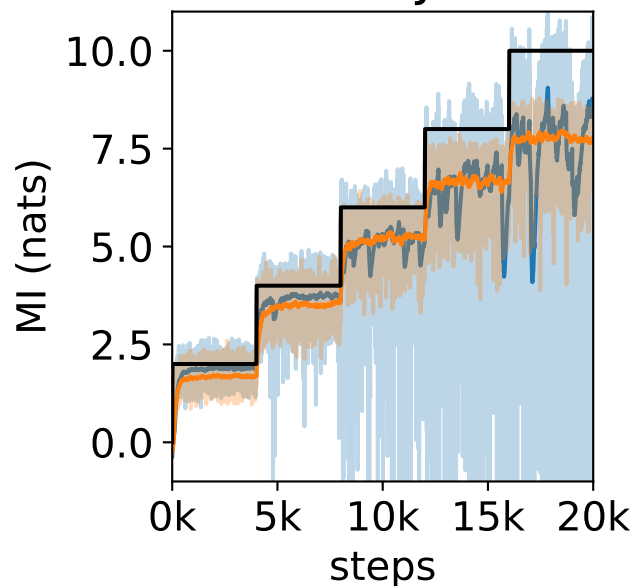

TUBA

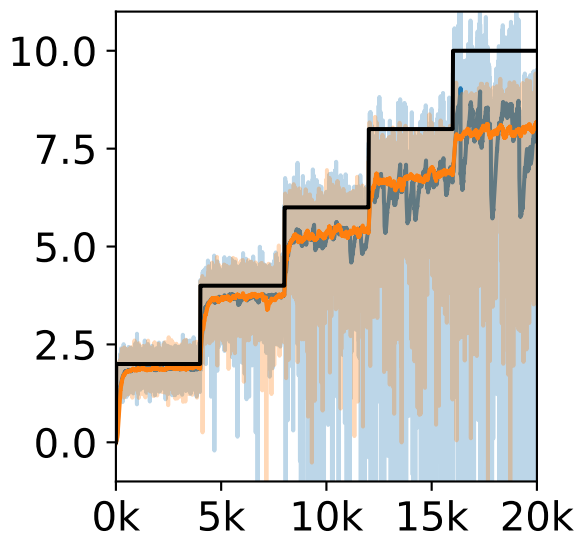

JS

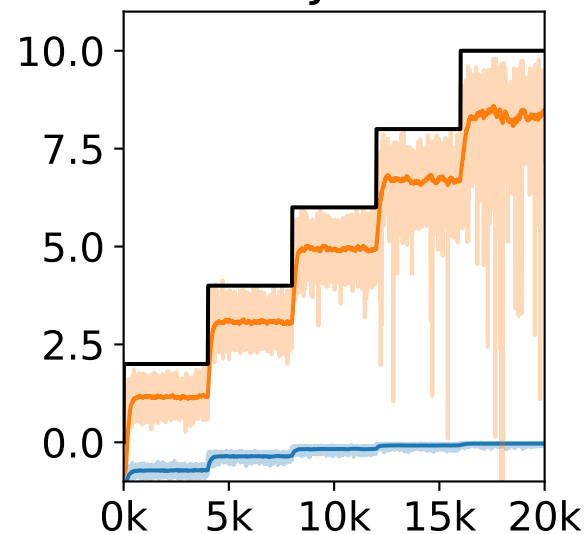

Original

Regularized

True MI

Supplement: supplementary_material [file attachment]

# ReMINE Loss Breakdown

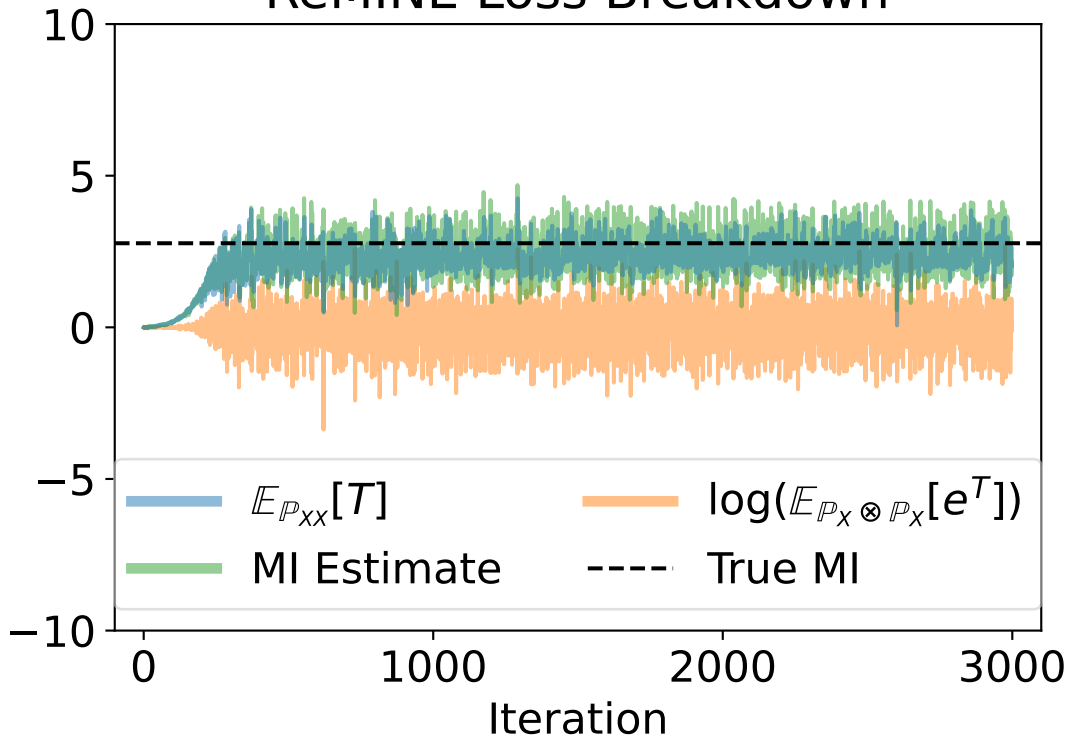

Supplement: supplementary_material [file attachment]

# NWJ-trained $T_{\theta}(x_1, x_2)$

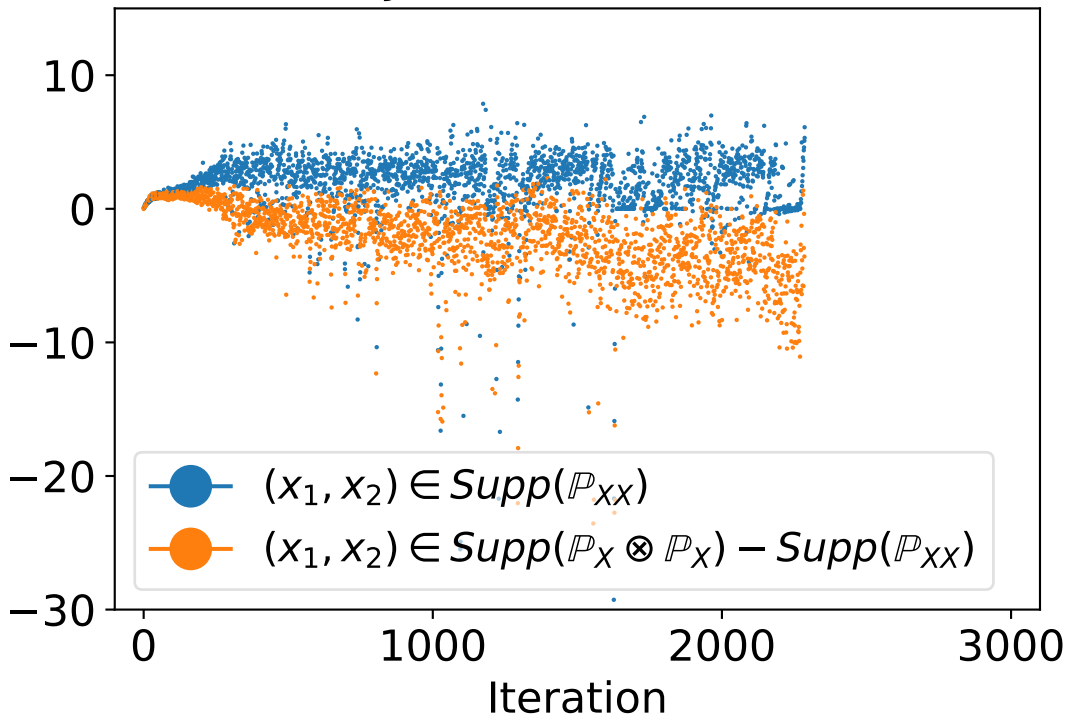

Supplement: supplementary_material [file attachment]

# MINE-trained $T_{\theta}(x_1, x_2)$

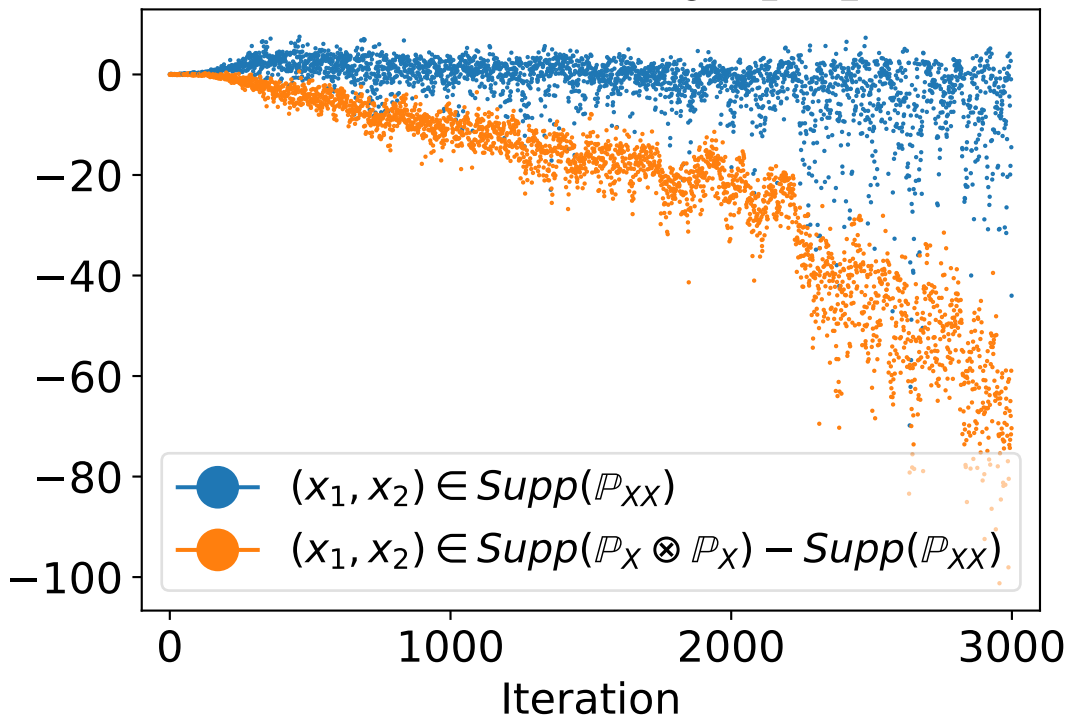

Supplement: supplementary_material [file attachment]

# MINE Loss Breakdown

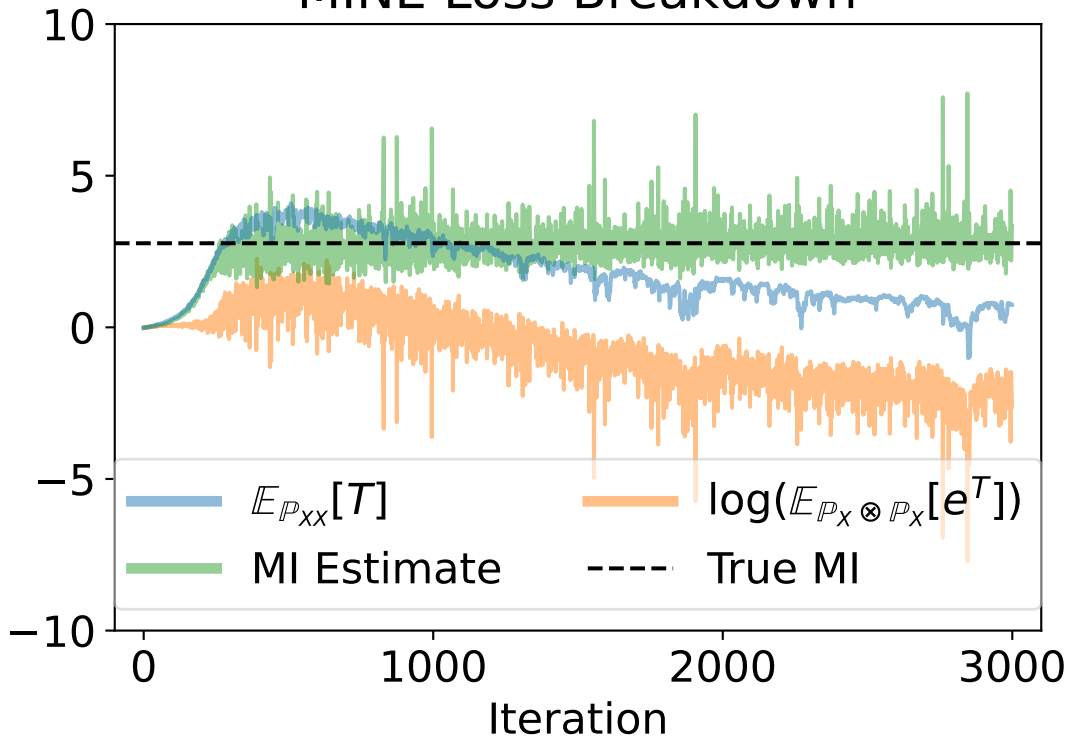

Supplement: supplementary_material [file attachment]

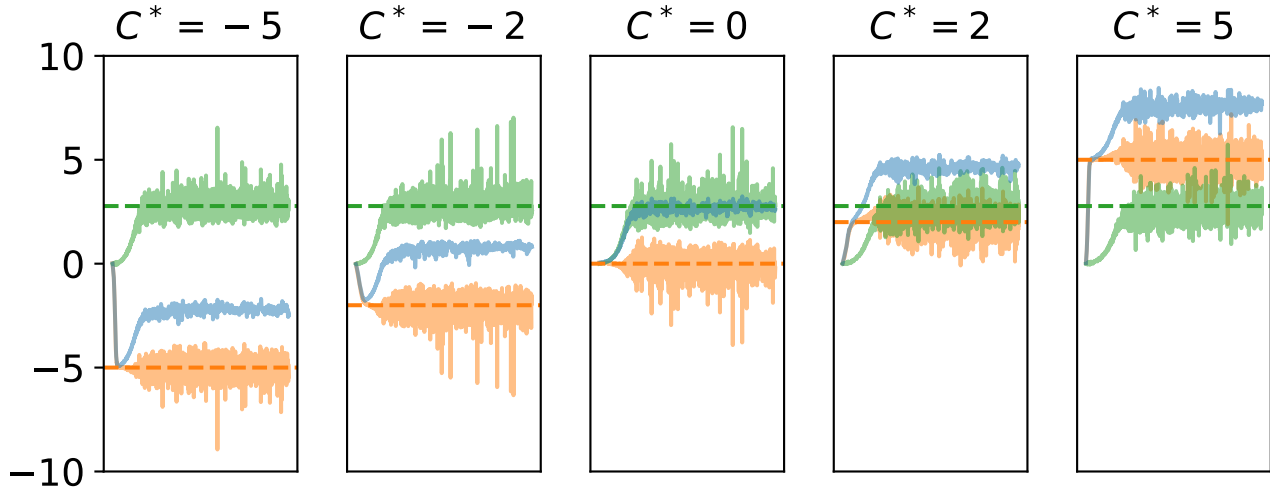

$\mathbb{E}_{P_{XY}}[T]$

Estimated MI

$\log(\mathbb{E}_{P_X \otimes P_Y}[e^T])$

True MI

$C^*$

Supplement: supplementary_material [file attachment]

CIFAR-10

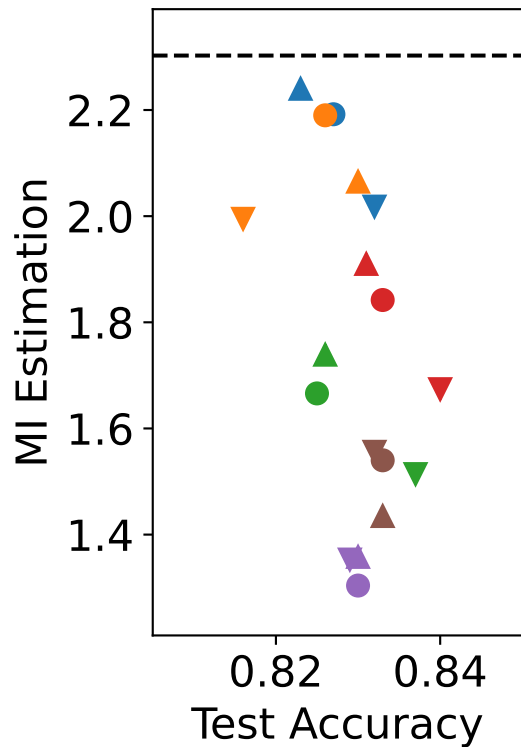

CIFAR-100

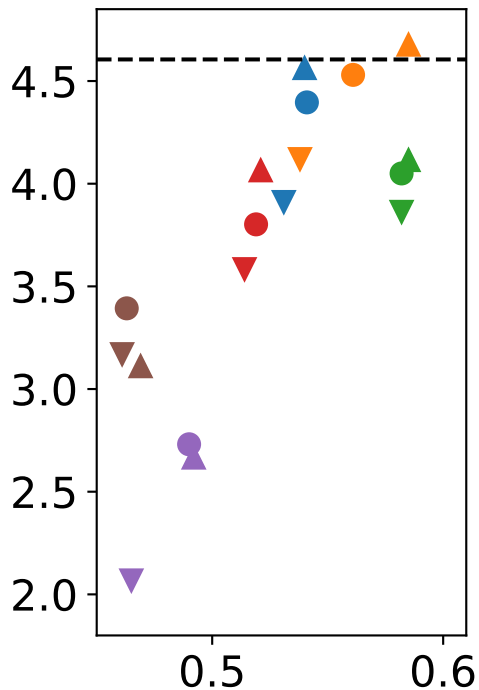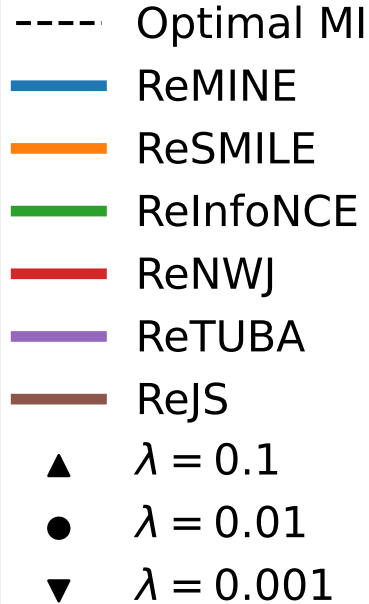

Supplement: supplementary_material [file attachment]

# ReNWJ-trained $T_{\theta}(x_1, x_2)$

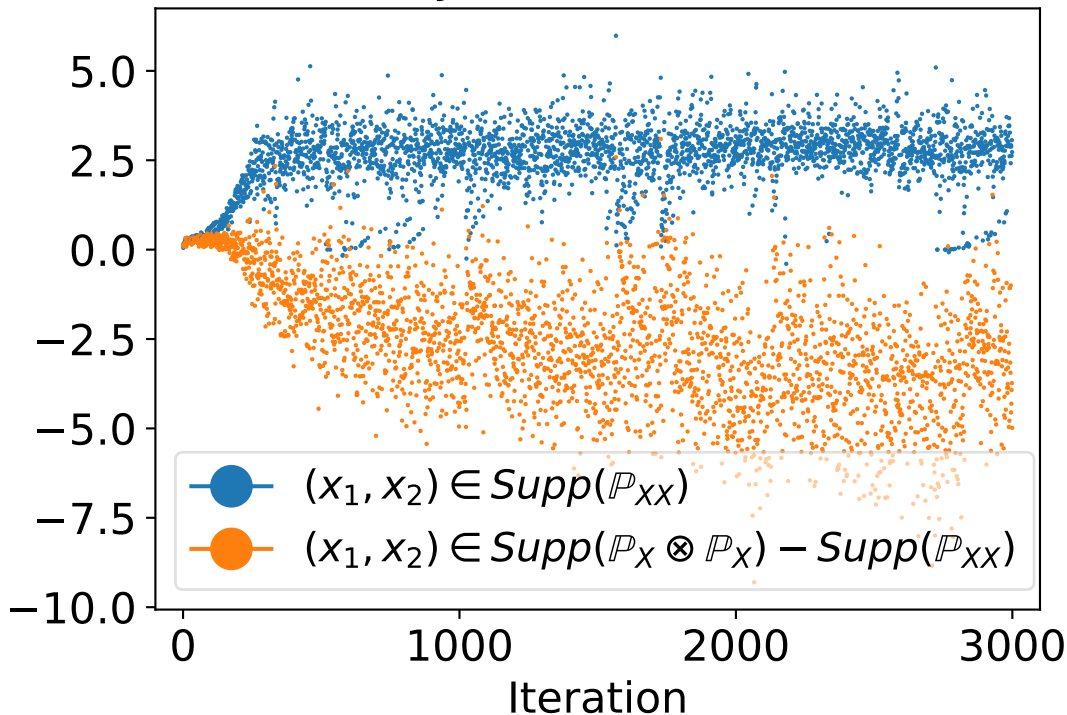

Supplement: supplementary_material [file attachment]

# NWJ-trained $T_{\theta}(x_1, x_2)$

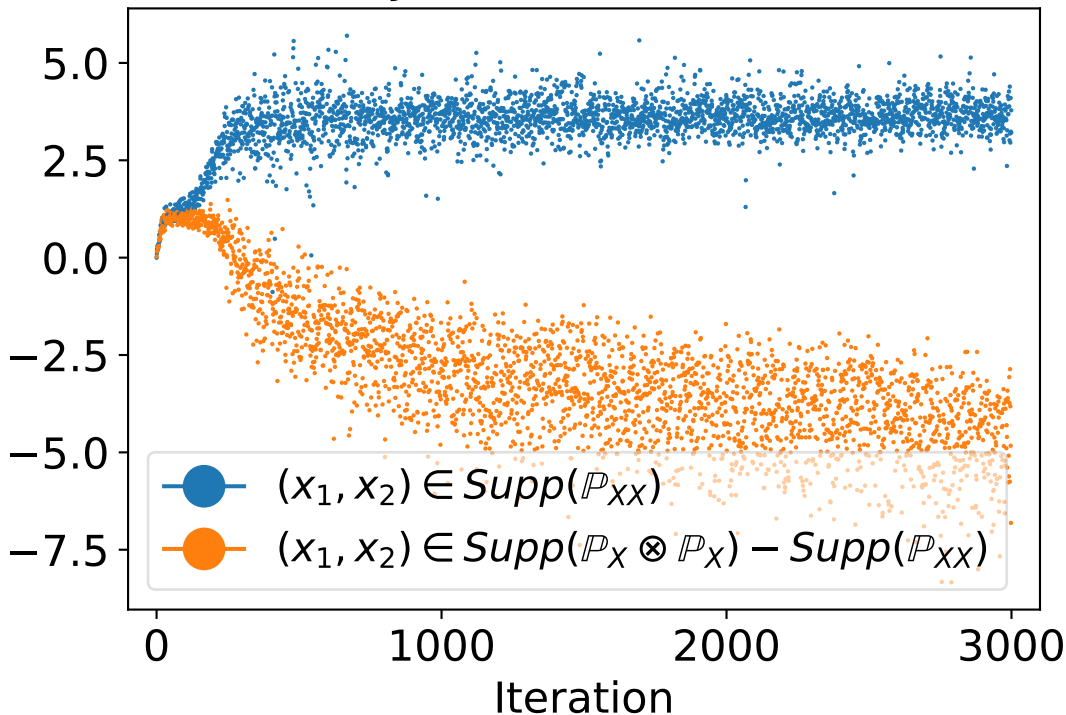

Supplement: supplementary_material [file attachment]

# ReMINE Loss Breakdown

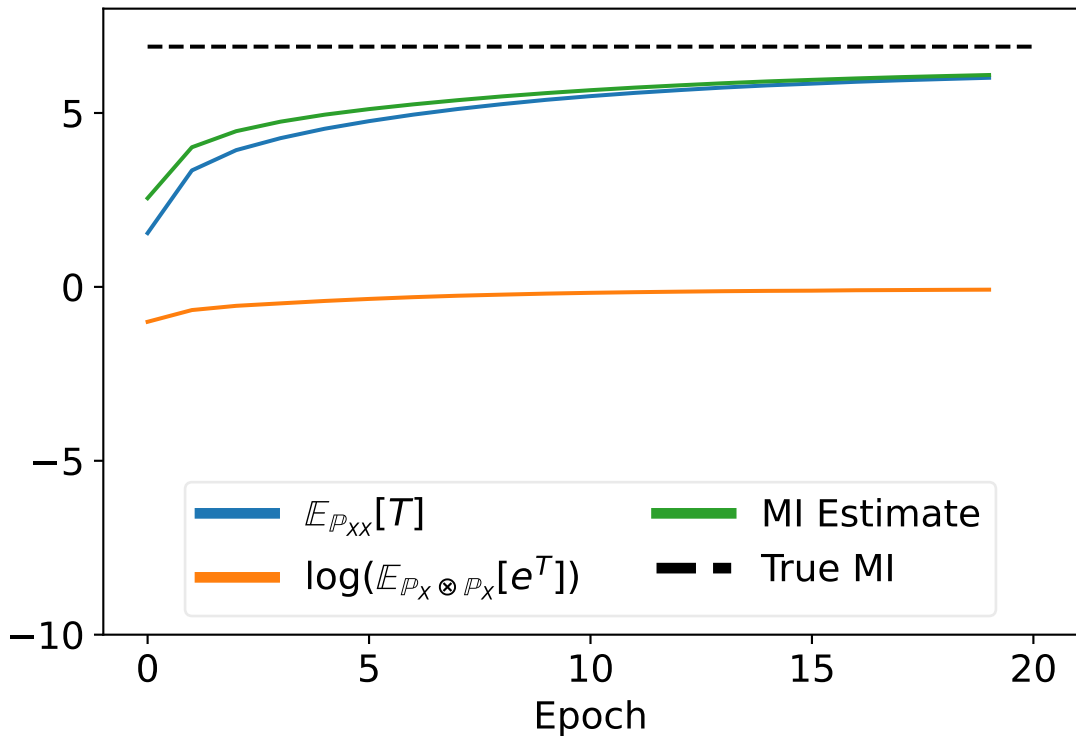

Supplement: supplementary_material [file attachment]

# ReMINE-trained $T_{\theta}(x_1, x_2)$

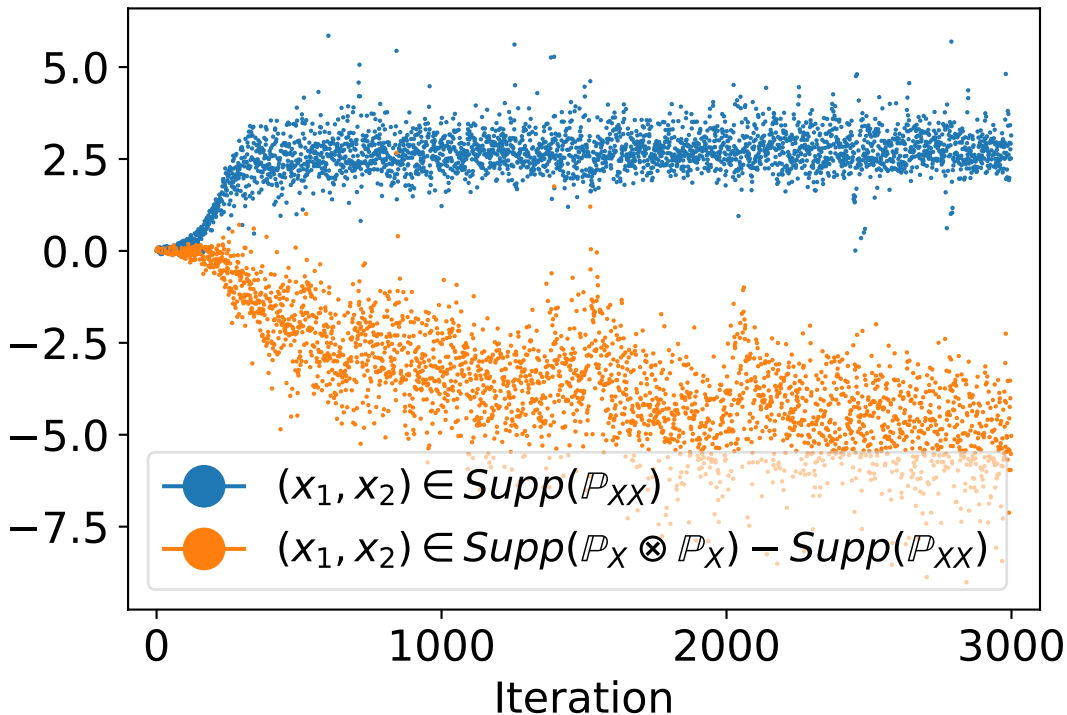

Supplement: supplementary_material [file attachment]

# ReNWJ-trained $T_{\theta}(x_1, x_2)$

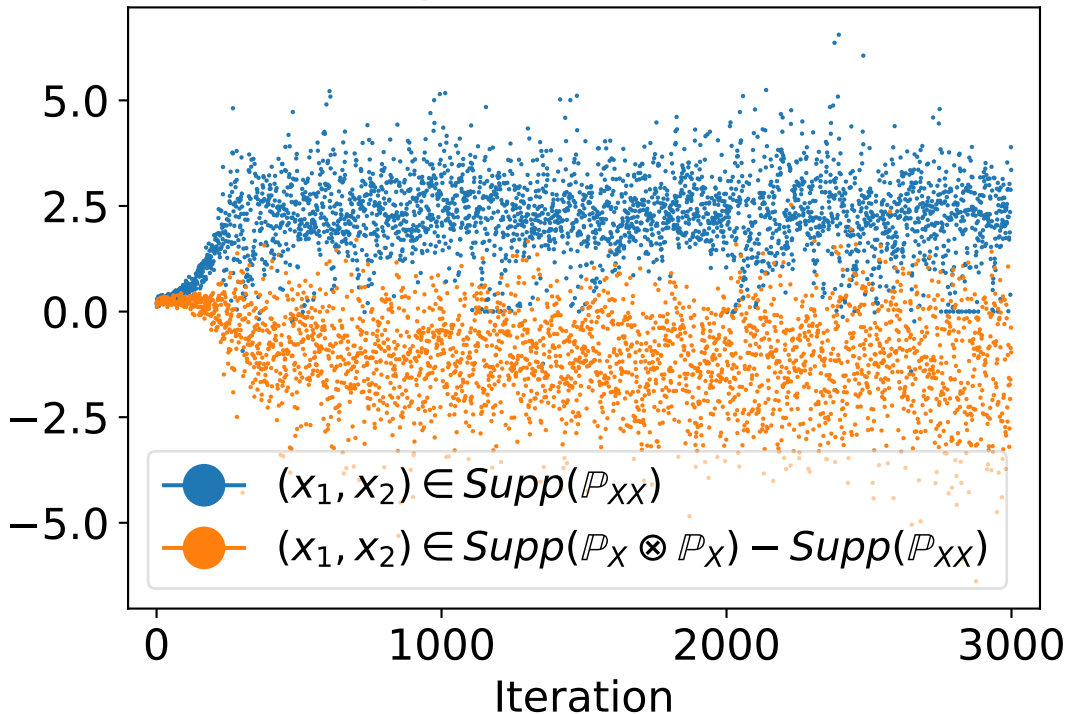

Supplement: supplementary_material [file attachment]

# MINE Loss Breakdown

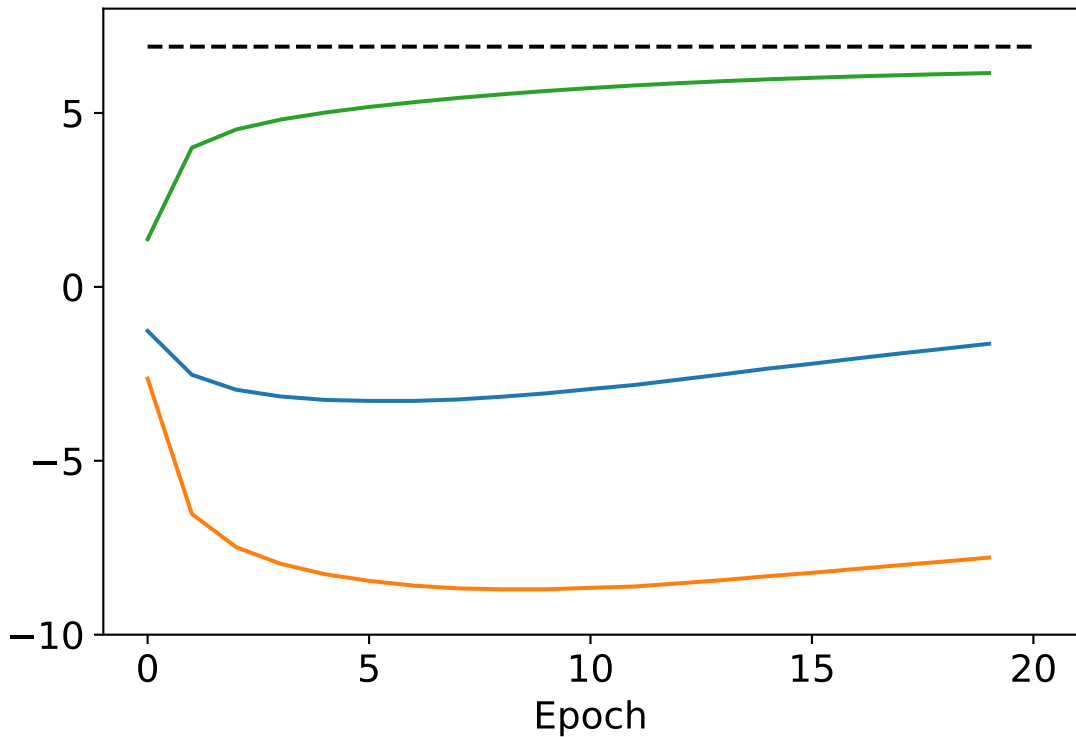

Supplement: supplementary_material [file attachment]

# MINE-trained $T_{\theta}(x_1, x_2)$

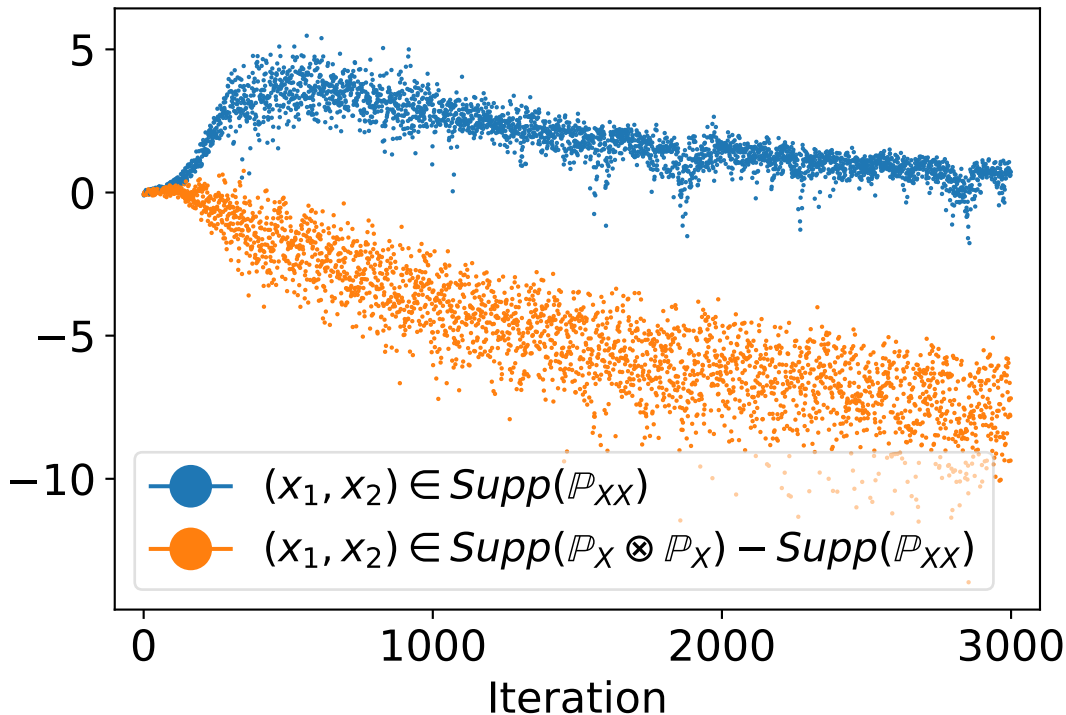

Supplement: supplementary_material [file attachment]
